# Supplementary material for: Circulating CXCR3+ Tfh cells positively correlate with neutralizing antibody responses in HCV-infected patients
Source: PubMed Central journal article supplement (PMC6626020; doi:10.1038/s41598-019-46533-w), 2019-07-12
Supplement: 41598_2019_46533_MOESM1_ESM.pdf [file 41598_2019_46533_MOESM1_ESM.pdf]

## **Circulating CXCR3+ Tfh cells positively correlate with neutralizing antibodies responses in HCV infected patients**

Jian Zhang<sup>1, #</sup>, Wenpei Liu<sup>1,2, #</sup>, Bo Wen<sup>1</sup>, Ting Xie<sup>1</sup>, Ping Tang<sup>1</sup>, Yabin Hu<sup>1</sup>, Liyan Huang<sup>1</sup>, Kun Jin<sup>1</sup>, Ping Zhang<sup>1</sup>, Ziyang Liu<sup>1</sup>, Ling Niu<sup>1</sup>, Xiaowang Qu<sup>1,2, \*</sup>

<sup>1</sup>Translational Medicine Institute, The First People's Hospital of Chenzhou, University of South China, Chenzhou, Hunan, 423000, China.

<sup>2</sup>Affiliated The First People's Hospital of Chenzhou, Southern Medical University, Chenzhou, Hunan, 423000, China.

### **Supplementary Table 1. Neutralizing antibody responses (titer and breadth) from individuals with HCV infection**

| Subject | HCVpp neutralization activity* |      |      |      |      |      | HCVpp neutralization breadth |
|---------|--------------------------------|------|------|------|------|------|------------------------------|
|         | gt1a                           | gt1b | gt2a | gt3a | gt4a | gt5a |                              |
| B026    | 6400                           | 400  | 400  | 400  | 400  | 400  | 6                            |
| A036    | 100                            | 100  | 50   | 6400 | 6400 | 6400 | 5                            |
| B040    | 400                            | 400  | 400  | 1600 | 1600 | 6400 | 6                            |
| B072    | 50                             | 50   | 50   | 50   | 50   | 50   | 0                            |
| B113    | 1600                           | 1600 | 1600 | 400  | 1600 | 6400 | 6                            |
| B123    | 400                            | 1600 | 400  | 400  | 6400 | 6400 | 6                            |
| A159    | 50                             | 100  | 50   | 100  | 100  | 100  | 4                            |
| C202    | 50                             | 50   | 50   | 50   | 50   | 50   | 0                            |
| C203    | 100                            | 100  | 50   | 50   | 50   | 50   | 2                            |
| C280    | 50                             | 400  | 100  | 100  | 100  | 400  | 5                            |
| C384    | 6400                           | 100  | 50   | 6400 | 6400 | 1600 | 5                            |
| C387    | 400                            | 100  | 400  | 100  | 400  | 1600 | 6                            |
| C423    | 100                            | 1600 | 1600 | 100  | 100  | 400  | 6                            |
| D008    | 50                             | 50   | 50   | 50   | 50   | 50   | 0                            |
| D110    | 1600                           | 400  | 400  | 400  | 1600 | 1600 | 6                            |

|       |      |      |      |      |      |      |   |
|-------|------|------|------|------|------|------|---|
| D116  | 6400 | 1600 | 400  | 400  | 6400 | 6400 | 6 |
| D218  | 6400 | 1600 | 1600 | 400  | 1600 | 1600 | 6 |
| D316  | 6400 | 1600 | 400  | 400  | 1600 | 1600 | 6 |
| D342  | 1600 | 400  | 100  | 100  | 6400 | 1600 | 6 |
| F001  | 1600 | 400  | 100  | 50   | 1600 | 6400 | 5 |
| F033  | 100  | 400  | 100  | 100  | 100  | 1600 | 6 |
| F041  | 100  | 100  | 100  | 100  | 50   | 6400 | 5 |
| F050  | 1600 | 400  | 400  | 1600 | 1600 | 6400 | 6 |
| F077  | 1600 | 50   | 100  | 400  | 400  | 1600 | 5 |
| F078  | 400  | 100  | 1600 | 100  | 1600 | 1600 | 6 |
| F089  | 1600 | 1600 | 400  | 100  | 1600 | 6400 | 6 |
| F125  | 1600 | 400  | 100  | 100  | 1600 | 6400 | 6 |
| F210  | 400  | 1600 | 400  | 1600 | 1600 | 6400 | 6 |
| F281  | 50   | 50   | 400  | 50   | 400  | 1600 | 3 |
| F317  | 6400 | 1600 | 6400 | 400  | 400  | 6400 | 6 |
| F385  | 400  | 50   | 400  | 100  | 1600 | 1600 | 5 |
| MA021 | 400  | 1600 | 400  | 100  | 1600 | 6400 | 6 |
| MA029 | 400  | 1600 | 1600 | 1600 | 400  | 6400 | 6 |
| MA050 | 1600 | 400  | 400  | 400  | 50   | 1600 | 5 |
| MA060 | 1600 | 400  | 1600 | 400  | 6400 | 6400 | 6 |
| MA102 | 6400 | 1600 | 6400 | 1600 | 6400 | 6400 | 6 |
| MB036 | 400  | 50   | 50   | 100  | 50   | 400  | 3 |
| MC027 | 100  | 1600 | 400  | 400  | 6400 | 6400 | 6 |

\*Data present as HCVpp inhibition endpoint titers and neutralization breadth to the HCVpp of each genotype.

**Supplementary Table 2. Correlations of HCV neutralizing antibody titer with cTfh cells or subsets from individuals with HCV infection**

|             | % cTfh in<br>CD4 <sup>+</sup> T cells | %CXCR3 <sup>+</sup> cTfh in<br>CD4 <sup>+</sup> T cells | %CXCR3 <sup>-</sup> cTfh in<br>CD4 <sup>+</sup> T cells | Ratio of CXCR3 <sup>+</sup> /CXCR3 <sup>-</sup><br>cTfh cells |
|-------------|---------------------------------------|---------------------------------------------------------|---------------------------------------------------------|---------------------------------------------------------------|
| <b>gt1a</b> | (0.196,0.239)                         | (0.479 <sup>**</sup> ,0.002)                            | (-0.102,0.544)                                          | (0.467 <sup>**</sup> ,0.003)                                  |
| <b>gt1b</b> | (0.351 <sup>*</sup> ,0.031)           | (0.535 <sup>**</sup> ,0.001)                            | (0.135,0.420)                                           | (0.260,0.114)                                                 |
| <b>gt2a</b> | (0.306,0.062)                         | (0.504 <sup>**</sup> ,0.001)                            | (0.042,0.803)                                           | (0.323 <sup>*</sup> ,0.048)                                   |
| <b>gt3a</b> | (0.304,0.063)                         | (0.423 <sup>**</sup> ,0.008)                            | (0.164,0.326)                                           | (0.212,0.201)                                                 |
| <b>gt4a</b> | (0.164,0.326)                         | (0.345 <sup>*</sup> ,0.034)                             | (-0.054,0.749)                                          | (0.371 <sup>*</sup> ,0.022)                                   |
| <b>gt5a</b> | (0.199,0.231)                         | (0.316,0.053)                                           | (-0.010,0.952)                                          | (0.311,0.057)                                                 |

\* $P < 0.05$ , \*\* $P < 0.01$ . Data present as  $R$  and  $P$  value. Spearman's correlation was used to evaluate the correlation between different variables

**Supplementary Table 3. The relationship of both PD-1 and CXCR3 biased cTfh cells populations with neutralization antibody responses from individuals with HCV infection**

|                                                                       | HCVpp neutralization activity |                 |                 |                |                |                 | HCVpp neutralization breadth |
|-----------------------------------------------------------------------|-------------------------------|-----------------|-----------------|----------------|----------------|-----------------|------------------------------|
|                                                                       | gt1a                          | gt1b            | gt2a            | gt3a           | gt4a           | gt5a            |                              |
| %PD-1 <sup>-</sup> CXCR3 <sup>+</sup> Tfh in CD4 <sup>+</sup> T cells | (0.536**,0.005)               | (0.615**,0.001) | (0.665**,0.000) | (0.482*,0.013) | (0.429*,0.029) | (0.502**,0.009) | (0.679**, <0.001)            |
| %PD-1 <sup>+</sup> CXCR3 <sup>+</sup> Tfh in CD4 <sup>+</sup> T cells | (0.340,0.089)                 | (0.298,0.139)   | (0.367,0.065)   | (0.268,0.186)  | (0.271,0.180)  | (0.164,0.424)   | (0.415*,0.035)               |
| %PD-1 <sup>+</sup> CXCR3 <sup>-</sup> Tfh in CD4 <sup>+</sup> T cells | (-0.517,0.007)                | (-0.471,0.015)  | (-0.376,0.058)  | (-0.172,0.400) | (-0.330,0.099) | (-0.338,0.091)  | (-0.387,0.051)               |
| %PD-1 <sup>-</sup> CXCR3 <sup>-</sup> Tfh in CD4 <sup>+</sup> T cells | (0.030,0.883)                 | (0.157,0.444)   | (0.199,0.330)   | (0.199,0.329)  | (0.057,0.782)  | (0.225,0.269)   | (0.127,0.537)                |

\* $P < 0.05$ , \*\* $P < 0.01$ . Data present as  $R$  and  $P$  value. Spearman's correlation was used to evaluate the correlation between different variables

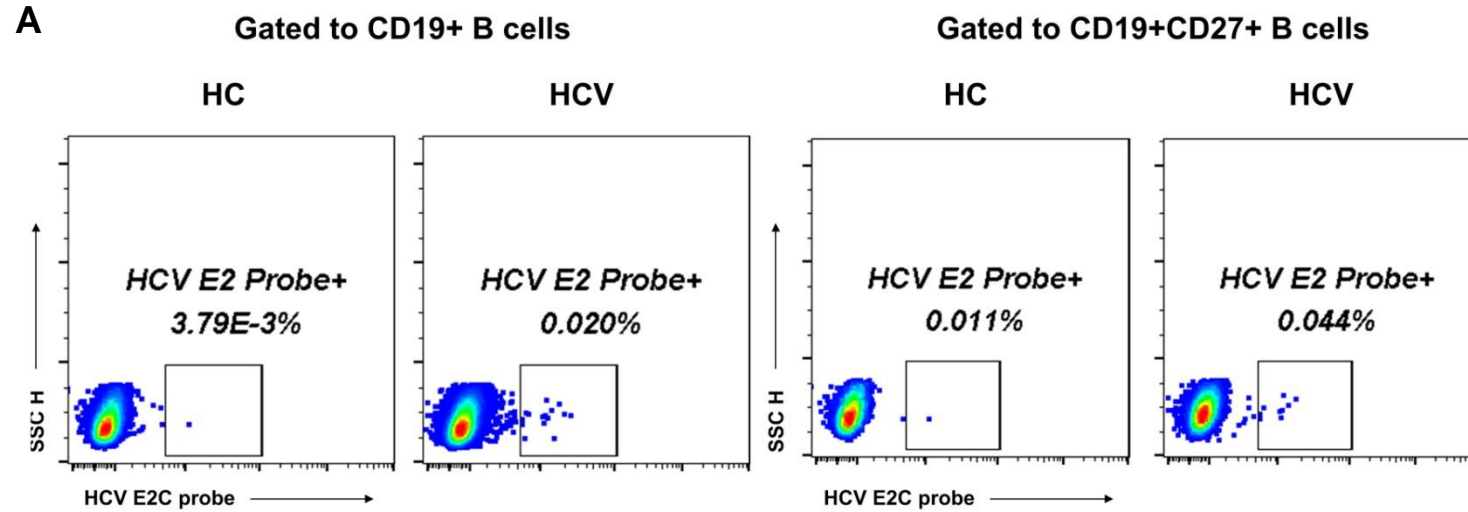

**B**

|                                                                         | Healthy controls(n=10) | HCV individuals(n=11) | <i>P</i> |
|-------------------------------------------------------------------------|------------------------|-----------------------|----------|
| %HCV E2 specific B cells in CD19 <sup>+</sup> B cells                   | 0.009(0.006,0.012)     | 0.032(0.016,0.039)    | <0.001   |
| %HCV E2 specific B cells in CD19 <sup>+</sup> CD27 <sup>+</sup> B cells | 0.02(0,0.025)          | 0.053(0.029,0.153)    | 0.003    |

**Supplementary Fig 1. The frequency of HCV E2-specific B cells in HCV patients and healthy controls.** (A) Representative flow cytometry plots of HCV E2-specific B cells staining in HCV infected patients and healthy controls. (B) Comparison of the frequency of HCV E2-specific B cells in total B cells (CD19<sup>+</sup>) and in memory B cells (CD19<sup>+</sup> CD27<sup>+</sup>) between HCV infected patients and healthy controls. Data present as median and interquartile range. Mann-Whitney U test was used for the analysis. *P*<0.05 means significantly different between groups.

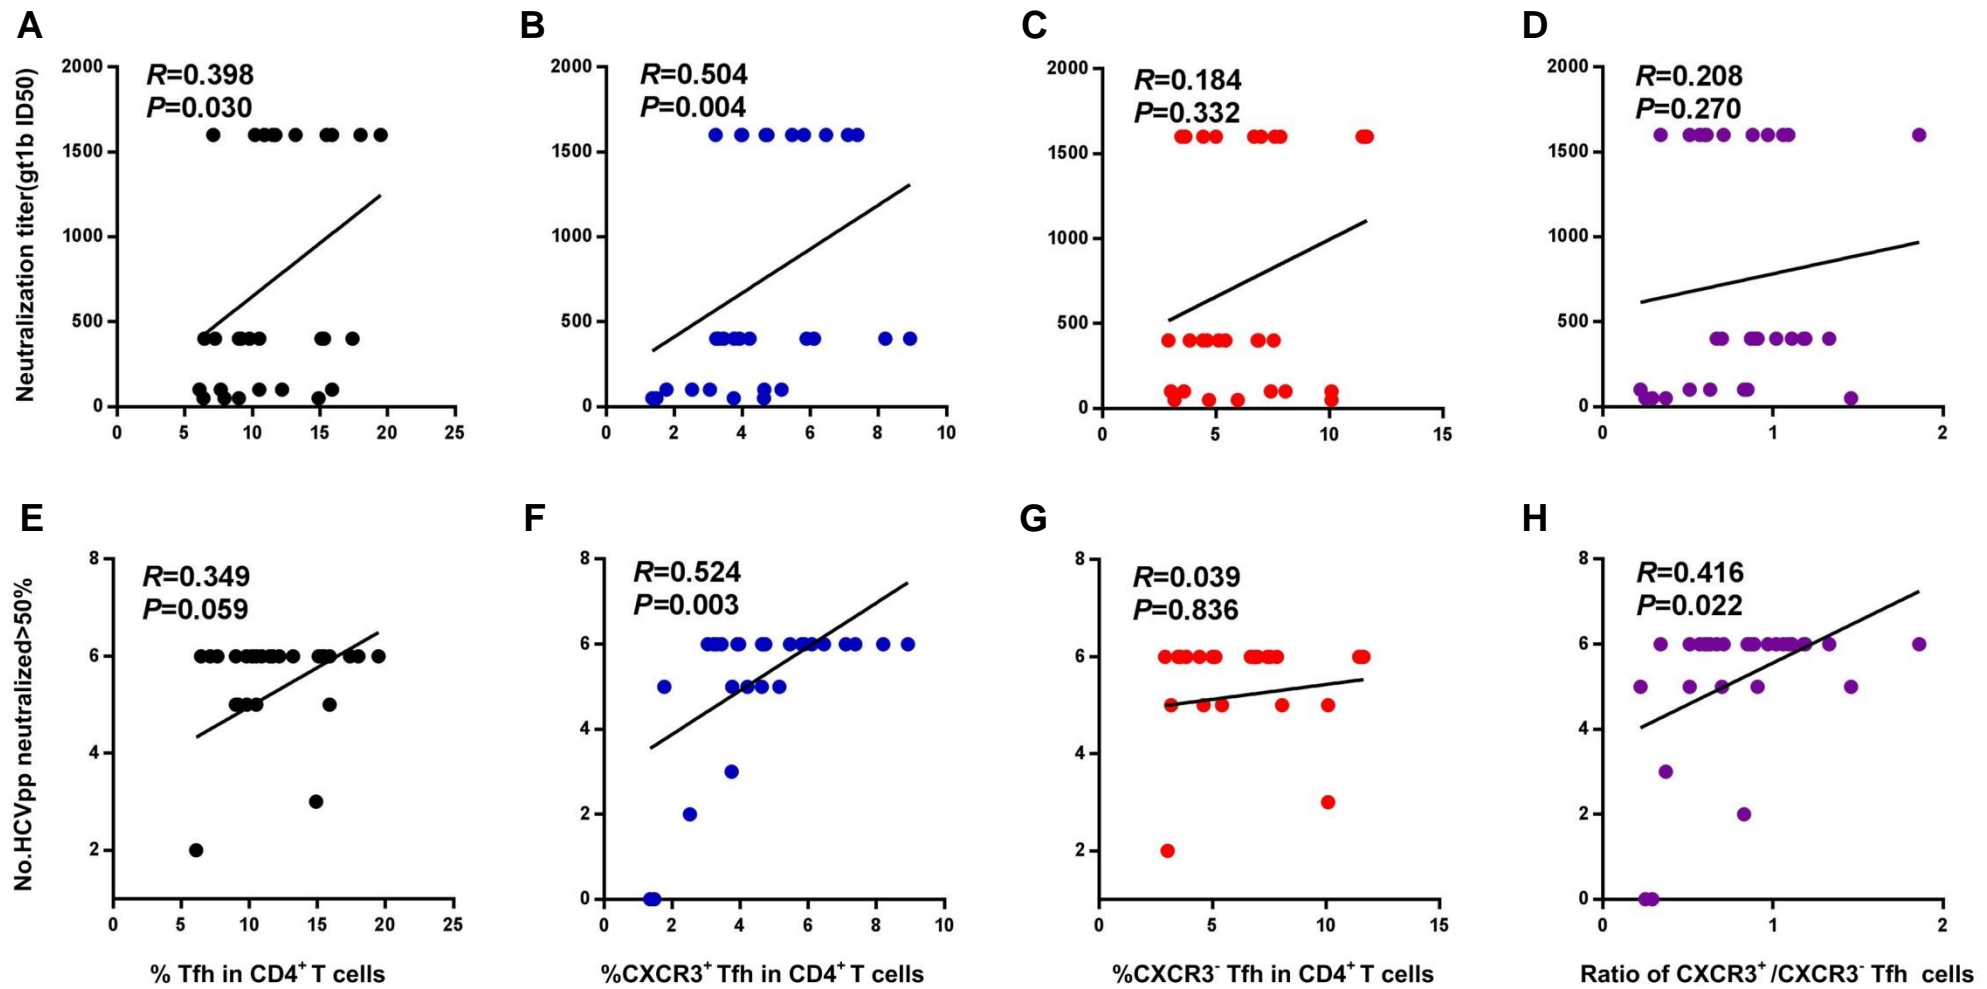

**Supplementary Fig 2. Relationship of cTfh cells and subsets with HCV neutralizing antibody responses in chronic HCV infected individuals.** (A-D) Correlations of the neutralization titer (genotype 1b as represent) with cTfh cells (A), CXCR3<sup>+</sup> cTfh cells (B), CXCR3<sup>-</sup> cTfh cells (C), and the ratio of CXCR3<sup>+</sup>/CXCR3<sup>-</sup> Tfh cells (D) in CD4<sup>+</sup> T cells in chronic HCV infection (n=30). (E-F) Correlations of the neutralization breadth with cTfh cells (E), CXCR3<sup>+</sup> cTfh cells (F), CXCR3<sup>-</sup> cTfh cells (G), and the ratio of CXCR3<sup>+</sup>/CXCR3<sup>-</sup> Tfh cells (H) in CD4<sup>+</sup> T cells in chronic HCV infection (n=30). Neutralization titers were calculated by endpoint dilution of serum (dilution started from 1:100). The neutralizing breadth was indicated by the number of HCVpps neutralized >50%; positive neutralization was categorized as a reduction in infectivity by 50% in this HCVpp system. Spearman  $R$  and  $P$  values were indicated.
